# Supplementary material for: Distribution and Sequential Fractionation of Fe and Mn with depth of Sundarban Mangrove Wetland Soils of Bangladesh
Source: Research Square preprint supplement (doi:10.21203/rs.3.rs-4483922/v1), 2024-06-14
Supplement: Supplementary file 1 [file 3a5e5a34f2ec8c7b680dd9f8.docx]

**Table 1.** Geographical location of the sampling sites.

| **Serial No.** | **Sample Name** | **Latitude** | **Longitude** | **Area Details** | | |
| --- | --- | --- | --- | --- | --- | --- |
| **Plot** | **Range** | **District** |
| 1 | Soil 1 | 22˚18ʹ10ʺ N | 89˚37ʹ04ʺ E | Harbaria | Chandpai | Bagherhat |
| 2 | Soil 2 | 22˚17ʹ52ʺ N | 89˚36ʹ53ʺ E | Harbaria | Chandpai | Bagherhat |
| 3 | Soil 3 | 21˚52ʹ30ʺ N | 89˚50ʹ10ʺ E | Kochikhali | Sarankhola | Bagherhat |
| 4 | Soil 4 | 21˚50ʹ43ʺ N | 89˚47ʹ43ʺ E | Jamtola | Sarankhola | Bagherhat |
| 5 | Soil 5 | 21˚51ʹ20ʺ N | 89˚46ʹ55ʺ E | Jamtola | Sarankhola | Bagherhat |
| 6 | Soil 6 | 21˚51ʹ37ʺ N | 89˚46ʹ07ʺ E | Kotka | Sarankhola | Bagherhat |
| 7 | Soil 7 | 21˚51ʹ31ʺ N | 89˚46ʹ00ʺ E | Kotka | Sarankhola | Bagherhat |
| 8 | Soil 8 | 22˚07ʹ47ʺ N | 89˚42ʹ45ʺ E | Horintana | Chandpai | Bagherhat |
| 9 | Soil 9 | 22˚25ʹ39ʺ N | 89˚35ʹ33ʺ E | Koromjol | Khulna | Khulna |
| 10 | Soil 10 | 22˚25ʹ33ʺ N | 89˚35ʹ35ʺ E | Koromjol | Khulna | Khulna |

**Table 2.** Methods for fractionation of Fe and Mn in the SMF soils (Shuman, 1985).

| Step | Fraction | Extractant | Soil (g) | Solution (ml) | Condition |
| --- | --- | --- | --- | --- | --- |
| 1 | Exchangeable (Exch.) | 1 *M* (MgNO3)2 (pH-7) | 10 | 40 | Shake 2 hours |
| 2 | Organically bound  (OrgB) | 0.7 *M* NaOCl (pH-8.5) | 10 | 20 | Boiling water bath for 30 min with stirring occasionally (repeat) |
| 3 | Manganese oxide bound (MnOB) | 0.1 *M* NH2OH.HCl (pH-2) | 1 | 20 | Shake 30 min |
| 4 | Amorphous Fe-oxide bound (AFeOB) | 0.2 *M* (NH4)2 C2O4. H20 + 0.2 *M* H2C2O4 (pH-3) | 1 | 50 | Shake 4 hours in the dark |
| 5 | Crystalline Fe-oxide bound (CFeOB) | Solution as step 4 + 0.1 *M* ascorbic acid | 1 | 50 | 30 min in boiling water bath with stirring occasionally |
| 6 | Residual (Res.) | Aqua-regia (HNO3 : HCl=1:3) | ~ 1 g | 50 | Digest about 2-3 hours at 150o C |

| **Table 3.** Selected physical, chemical and physicochemical properties of SMF soils. | Textural | Silt | Silt | Silt loam | Silt | Silt | Silt | Clay loam | Sandy clay loam | Silt | Silt loam | Silt loam | Silt | Silt loam | Silt | Silt loam | Silt | Silty Clay Loam | Silt loam | Silt | Silt |
| --- | --- | --- | --- | --- | --- | --- | --- | --- | --- | --- | --- | --- | --- | --- | --- | --- | --- | --- | --- | --- | --- |
| class |
| Clay | 6.65 | 6.63 | 14.4 | 6.69 | 9.23 | 6.66 | 32.8 | 24.6 | 6.73 | 6.7 | 17.1 | 9.36 | 14.3 | 11.8 | 19.5 | 6.67 | 27.4 | 19.6 | 11.8 | 11.5 |
| Silt | 88.77 | 91.02 | 82.69 | 89.26 | 86.39 | 90.19 | 45.6 | 49.69 | 82.04 | 76.49 | 79.42 | 85.04 | 75.96 | 80.95 | 76.29 | 89.05 | 69.04 | 74.12 | 83.83 | 84.32 |
| Sand | 4.57 | 2.36 | 2.94 | 4.05 | 4.38 | 3.14 | 21.5 | 25.8 | 11.2 | 16.8 | 3.51 | 5.6 | 9.72 | 7.3 | 4.18 | 4.28 | 3.55 | 6.25 | 4.38 | 4.17 |
| Eh | -80.8±1.95 | -89.5±2.64 | -98.5±1.81 | -97.7±2.07 | -90.8±2.80 | -98.6±1.49 | +27.5±2.22 | +2.7±2.11 | -70.2±2.74 | -74.2±1.42 | -65.3±1.73 | -72.5±2.38 | -79.7±2.46 | -68.6±2.45 | -82.1±3.14 | -91.5±1.57 | -77.8±1.24 | -88.5±2.41 | -81.5±1.62 | -88.3±1.82 |
| CEC | 29.83±0.13 | 26.13±0.27 | 25.41±0.17 | 23.20±0.33 | 25.83±0.30 | 26.4±0.08 | 35.50±0.39 | 28.37±0.47 | 36.51±0.21 | 30.46±0.14 | 31.84±0.01 | 32.53±0.09 | 25.24±0.44 | 21.16±0.60 | 21.47±0.24 | 18.68±0.07 | 31.63±0.17 | 28.76±0.04 | 33.26±0.51 | 31.20±0.23 |
| OM | 3.09±0.03 | 2.89±0.06 | 3.36±0.03 | 3.23±0.07 | 2.42±0.04 | 2.15±0.04 | 11.43±0.34 | 13.90±0.11 | 3.03±0.03 | 3.09±0.07 | 2.35±0.03 | 2.49±0.04 | 2.89±0.27 | 2.62±0.21 | 2.42±0.06 | 2.75±0.06 | 2.56±0.10 | 2.22±0.07 | 2.82±0.15 | 2.69±0.21 |
| pH | 7.62±0.01 | 8.09±0.01 | 7.90±0.02 | 7.95±0.01 | 7.82±0.01 | 7.86±0.01 | 6.12±0.02 | 6.45±0.05 | 7.39±0.03 | 7.42±0.01 | 7.44±0.01 | 7.61±0.01 | 7.55±0.10 | 8.02±0.06 | 7.44±0.03 | 7.64±0.01 | 7.32±0.01 | 7.40±0.03 | 7.31±0.01 | 7.44±0.01 |
| Moisture | 35.63 | 27.08 | 34.63 | 35.09 | 35.27 | 38.807 | 25.09 | 19.28 | 30.63 | 31.24 | 37.75 | 41.09 | 32.48 | 33.25 | 39.18 | 42.4 | 46.47 | 41.71 | 40.64 | 44.5 |
| Layer | Surface | Subsurface | Surface | Subsurface | Surface | Subsurface | Surface | Subsurface | Surface | Subsurface | Surface | Subsurface | Surface | Subsurface | Surface | Subsurface | Surface | Subsurface | Surface | Subsurface |
| Soil | Soil 1 | | Soil 2 | | Soil 3 | | Soil 4 | | Soil 5 | | Soil 6 | | Soil 7 | | Soil 8 | | Soil 9 | | Soil 10 | |

| **Table 4.** Iron concentration ± SD (µgg-1) among six fractions and % recovery in different Sundarban wetland soils. | % Recovery | 99.3 | 98.3 | 94.9 | 97 | 96.9 | 97.1 | 93.4 | 93.4 | 96.7 | 93.1 | 94.6 | 94.4 | 96.2 | 89.9 | 103.3 | 94.6 | 97.6 | 108.9 | 96.4 | 97.8 |
| --- | --- | --- | --- | --- | --- | --- | --- | --- | --- | --- | --- | --- | --- | --- | --- | --- | --- | --- | --- | --- | --- |
| Total Fe | 20237.5±232.5 | 21787.5±837.9 | 25570±290 | 25552.5±121 | 26105±440 | 26125±144.2 | 21192.5±297.5 | 20920±804 | 27932.5±257.5 | 28310±318.6 | 29760±655 | 33960±1656.8 | 20902.5±912.5 | 22307.5±365.4 | 28190±525 | 27592.5±350.3 | 23432.5±172.5 | 22762.5±201.9 | 22365±575 | 23135±641.1 |
| Res. | 11243.4±196.7 | 12106.6±258.2 | 16895.8±225.6 | 15865.8±301.8 | 16369.7±167.3 | 16525±320.5 | 10941.7±255.5 | 10893.1±152.7 | 17569.4±48.7 | 16352.8±250.3 | 16933.3±125.4 | 19469.4±116.2 | 12145.8±29.5 | 13472.2±23.5 | 18975±375.1 | 16675±225.4 | 16384.7±158.6 | 15997.4±293.2 | 15643.4±140.3 | 16052.8±374.8 |
| CrFeOB | 7069.9±198.2 | 7250.5±181.8 | 4369.5±128.3 | 6067.5±165.5 | 6307.8±104.9 | 6534.7±130.9 | 3542.6±124.8 | 5902.9±186.9 | 5902.5±113.9 | 6713.3±107.3 | 5986.1±98.3 | 8248.3±97.7 | 4710.7±111.7 | 3832.9±99.9 | 5217.4±147.6 | 5523.4±108.8 | 3584.3±156.6 | 6665.6±214.8 | 3048±121.6 | 3756.7±164.5 |
| AFeOB | 1310±50.5 | 1646.5±47.5 | 2571±51.6 | 2512.3±69 | 2083.8±43.7 | 1916.8±52.1 | 4334.3±116.8 | 1968.8±75.4 | 2786±65.6 | 2689.8±41.5 | 4148.5±144.1 | 3618.3±111.3 | 2132.8±86.4 | 1972.3±93.0 | 3893.8±63.8 | 3140.3±58.2 | 2260.5±79.2 | 1627±82.3 | 2201.8±118.6 | 2263±86.7 |
| MnOB | 467±44.5 | 402.6±32.5 | 410.8±45.5 | 333±57.7 | 523.2±34.8 | 384.2±21.4 | 750.6±32.1 | 705.4±35.7 | 746.4±31.7 | 588.2±36.0 | 1067.8±20.9 | 711.6±15.1 | 1188.6±21.4 | 777.2±36.9 | 1004.8±47.6 | 752±29.7 | 573.2±18.0 | 463.4±23.1 | 646.6±7.78 | 540.8±27.9 |
| OrgB | 16.0±1.6 | 11.6±1.4 | 16.7±1.7 | 10.9±1.1 | 9.1±1.9 | 7.4±1.8 | 215.9±15.8 | 57.2±2.4 | 7.2±0.7 | 9.5±1.2 | 9.9±0.36 | 10.8±1.2 | 15.9±0.8 | 8.9±0.8 | 28.8±1.3 | 10.4±0.6 | 53.7±1.47 | 22.8±1.1 | 17.2±0.39 | 17±1.2 |
| Exch. | 1.28±0.7 | 1.09±0.5 | 2.94±0.9 | 2.72±0.7 | 4.96±0.4 | 4.67±0.6 | 8.54±0.5 | 7.07±0.8 | 2.82±0.9 | 7.94±0.5 | 5.15±0.5 | 6.14±0.5 | 5.5±1.0 | 5.12±0.9 | 4.58±0.5 | 4.80±0.3 | 5.54±1.0 | 5.38±0.7 | 4.8±0.6 | 5.73±0.5 |
| Layer | Surface | Subsurface | Surface | Subsurface | Surface | Subsurface | Surface | Subsurface | Surface | Subsurface | Surface | Subsurface | Surface | Subsurface | Surface | Subsurface | Surface | Subsurface | Surface | Subsurface |
| Soils | Soil 1 | | Soil 2 | | Soil 3 | | Soil 4 | | Soil 5 | | Soil 6 | | Soil 7 | | Soil 8 | | Soil 9 | | Soil10 | |

**Table 5.** Pearson Correlation coefficient (r) for different fractions of Fe and soil properties.

| Iron fractions.  /Properties | Fe Fractions | | | | | |
| --- | --- | --- | --- | --- | --- | --- |
| Exch. | OrgB | MnOB | AFeOB | CrFeOB | Res. |
| OrgB | **0.512*** |  |  |  |  |  |
| MnOB | 0.360 | 0.112 |  |  |  |  |
| AFeOB | 0.420 | 0.430 | **0.535**** |  |  |  |
| CrFeOB | -0.264 | -0.386 | -0.226 | -0.110 |  |  |
| Res. | -0.011 | **-0.447*** | 0.012 | 0.377 | 0.154 |  |
| pH | **-0.667**** | **-0.799**** | -0.299 | -0.386 | 0.302 | 0.358 |
| Clay | **0.533**** | **0.768**** | 0.304 | 0.348 | **-0.484*** | -0.266 |
| CEC | **0.625**** | **0.653**** | 0.188 | **0.699**** | -0.217 | 0.058 |
| OM | **0.463*** | **0.714**** | 0.083 | 0.162 | -0.161 | **-0.601**** |
| Eh | **0.595**** | **0.714**** | 0.303 | 0.378 | -0.215 | -0.537 |
| Total Fe | 0.098 | -0.333 | 0.157 | **0.586**** | **0.437*** | **0.874**** |

* Indicates 0.05 level of significance, ** indicates 0.01 level of significance

| Table 6: Manganese concentration ± SD (µgg-1) among six fractions and % recovery in different Sundarban wetland soils. | % Recovery | 91.2 | 98.9 | 90.2 | 106.5 | 97.2 | 95 | 95.3 | 97.6 | 94.7 | 103.8 | 93.8 | 102.7 | 96.7 | 99.1 | 91.85 | 106.8 | 94.6 | 103.85 | 97 | 106.1 |
| --- | --- | --- | --- | --- | --- | --- | --- | --- | --- | --- | --- | --- | --- | --- | --- | --- | --- | --- | --- | --- | --- |
| Total Mn | 375.55±17.5 | 368.85±7.5 | 468.05±5 | 443.50±15 | 410.55±12.5 | 442.38±2.5 | 385.55±12.5 | 341.62±82.5 | 535.55±7.5 | 455.44±7.5 | 665.05±35 | 593.93±10 | 335.55±2.5 | 337.56±10 | 525.55±42.5 | 459.47±7.5 | 445.55±7.5 | 444.06±10 | 415.55±12.5 | 424.35±7.5 |
| Res. | 163.5±4.8 | 170.8±5.6 | 198.6±5.5 | 200±12.7 | 215.2±15.3 | 206.8±2.9 | 137.4±7.5 | 119.4±5.3 | 196.6±15.1 | 175.8±10.3 | 182.8±8.6 | 226.7±7.8 | 176.9±5.2 | 192.5±8.6 | 218.3±24.6 | 223.9±16.2 | 226.5±12.9 | 238.35±17.7 | 222.9±9.2 | 228.35±7.9 |
| CrFeOB | 51.1±12.5 | 46.4±15.3 | 49.7±8.6 | 55.8±12.4 | 54.4±10.4 | 49.8±9.7 | 39.9±6.8 | 55.7±12.7 | 52.7±9.8 | 54.1±8.6 | 91.1±8.2 | 84.4±13.6 | 47.7±4.8 | 39.4±6.3 | 54.7±10.5 | 62.6±9.9 | 47.8±11.2 | 69.8±2.4 | 33.8±3.8 | 48.2±4.3 |
| AmFeOB | 27.8±7.7 | 43.3±11.1 | 64.3±13.3 | 69±8.6 | 43.8±5.0 | 48.3±3.5 | 65.5±6.4 | 32.7±7.4 | 85.3±10.8 | 85.814.7 | 128.5±18.9 | 110.8±15 | 37.8±9.5 | 40.3±14.8 | 79±11.2 | 81.2±19.5 | 49.2±7.2 | 35.7±10.6 | 41.1±12.0 | 57.6±8.5 |
| MnOB | 89.3±10.1 | 93.6±2.3 | 79.9±10.4 | 136±7.1 | 72.8±3.9 | 104.8±9.4 | 47.8±8.4 | 18.8±8.1 | 155.6±9.4 | 139.9±6.3 | 192.6±14.2 | 161.4±6.5 | 44.4±11.0 | 44.9±5.1 | 87.4±8.7 | 95.7±8.2 | 73.4±9.8 | 96.4±9.7 | 85.4±7.7 | 92.2**±**6.5 |
| OrgB | 6.1±1.5 | 7.7±1.5 | 24.2±2.1 | 7.5±1.4 | 9.3±1.5 | 7.4±1.5 | 29.4±3.6 | 51.2±2.3 | 10.8±1.3 | 9.2±1.6 | 13.2±1.2 | 31.0±2.2 | 12.6±1.1 | 10.4±1.2 | 19.9±1.8 | 15.9±1.7 | 13.7±1.6 | 15.8±1.8 | 11.5±0.7 | 13.8±2.0 |
| Exch. | 4.64±0.92 | 3.136±0.96 | 5.28±1.28 | 3.744±0.71 | 3.84±0.91 | 3.26±0.84 | 47.29±1.35 | 55.49±1.53 | 6.21±0.88 | 8.22±1.16 | 15.90±0.68 | 5.92±0.78 | 5.15±1.21 | 6.91±1.04 | 21.44±1.20 | 11.46±1.23 | 10.82±1.28 | 3.65±0.98 | 8.51±0.86 | 9.86±0.95 |
| Layer | Surface | Subsurface | Surface | Subsurface | Surface | Subsurface | Surface | Subsurface | Surface | Subsurface | Surface | Subsurface | Surface | Subsurface | Surface | Subsurface | Surface | Subsurface | Surface | Subsurface |
| Soils | Soil 1 | | Soil 2 | | Soil 3 | | Soil 4 | | Soil 5 | | Soil 6 | | Soil 7 | | Soil 8 | | Soil 9 | | Soil10 | |

**Table 7:** Pearson Correlation coefficient (r) for different fractions of Mn and soil properties.

| Mn Fractions /properties | Mn Fractions | | | | |  |
| --- | --- | --- | --- | --- | --- | --- |
| Exch. | OrgB | MnOB | AFeOB | CrFeOB | Res. |
| OrgB | **0.802**** |  |  |  |  |  |
| MnOB | -0.426 | -0.337 |  |  |  |  |
| AFeOB | -0.007 | 0.069 | **0.792**** |  |  |  |
| CrFeOB | -0.065 | 0.183 | **0.666**** | **0.684**** |  |  |
| Res. | **-0.651**** | -0.406 | 0.325 | 0.156 | 0.186 |  |
| pH | **-0.879**** | **-0.669**** | 0.307 | -0.004 | 0.071 | **0.498*** |
| Clay | **0.725**** | **0.589**** | **-0.450*** | -0.089 | -0.065 | -0.0276 |
| CEC | **0.579**** | **0.474*** | 0.100 | **0.446*** | 0.162 | -0.092 |
| OM | **0.932**** | **0.788**** | **-0.500*** | -0.184 | -0.177 | **-0.766**** |
| Eh | **0.914**** | **0.695**** | -0.364 | 0.000 | -0.098 | -**0.723**** |
| Total Mn | 0.159 | 0.006 | **0.849**** | **0.892**** | **0.762**** | 0.383 |

* Indicates 0.05 level of significance, ** indicates 0.01 level of significance

Table 8: Pearson correlation coefficient of Fe and Mn fractions in distinct locations and depth

| Fractions | Fe | | | | Mn | | | |
| --- | --- | --- | --- | --- | --- | --- | --- | --- |
| Location | | Depth | | Location | | Depth | |
| F | P | F | P | F | P | F | P |
| Exch. | 5.3 | 0.005 | 0.35 | 0.708 | 25.86 | 0.000 | 1.02 | 0.372 |
| OrgB | 2.39 | 0.08 | 2.04 | 0.149 | 4.09 | 0.015 | 4.45 | 0.021 |
| MnOB | 7.94 | 0.001 | 44.45 | 0.000 | 15.48 | 0.000 | 20.47 | 0.000 |
| AFeOB | 7.01 | 0.002 | 45.55 | 0.000 | 19.88 | 0.000 | 20.12 | 0.000 |
| CrFeOB | 7.21 | 0.002 | 82.45 | 0.000 | 14.94 | 0.000 | 59.42 | 0.000 |
| Res. | 70.24 | 0.000 | 165.15 | 0.000 | 58.43 | 0.000 | 170.77 | 0.000 |
